# Supplementary material for: Interaction of Subculture Cycle, Hormone Ratio, and Carbon Source Regulates Embryonic Differentiation of Somatic Cells in Pinus koraiensis
Source: MDPI journal article supplement (doi:10.3390/f13101557), 2022-09-23
Supplement: s1 [file s1]

Archive with 1 entries (1 files):
- forests-1892334-supplementary.pdf
